# Supplementary material for: Chickenpox and Risk of Stroke: A Self-controlled Case Series Analysis
Source: PubMed Central journal article supplement (PMC3864501; doi:10.1093/cid/cit659), 2013-10-02

Supplementary Figure 1: Age-adjusted incidence ratios (IR) for non-fatal stroke in periods following chickenpox, in children and adults. For each database, the central diamond and line correspond to the IR and 95% CI, and the area of the grey square reflects the weight of the study.

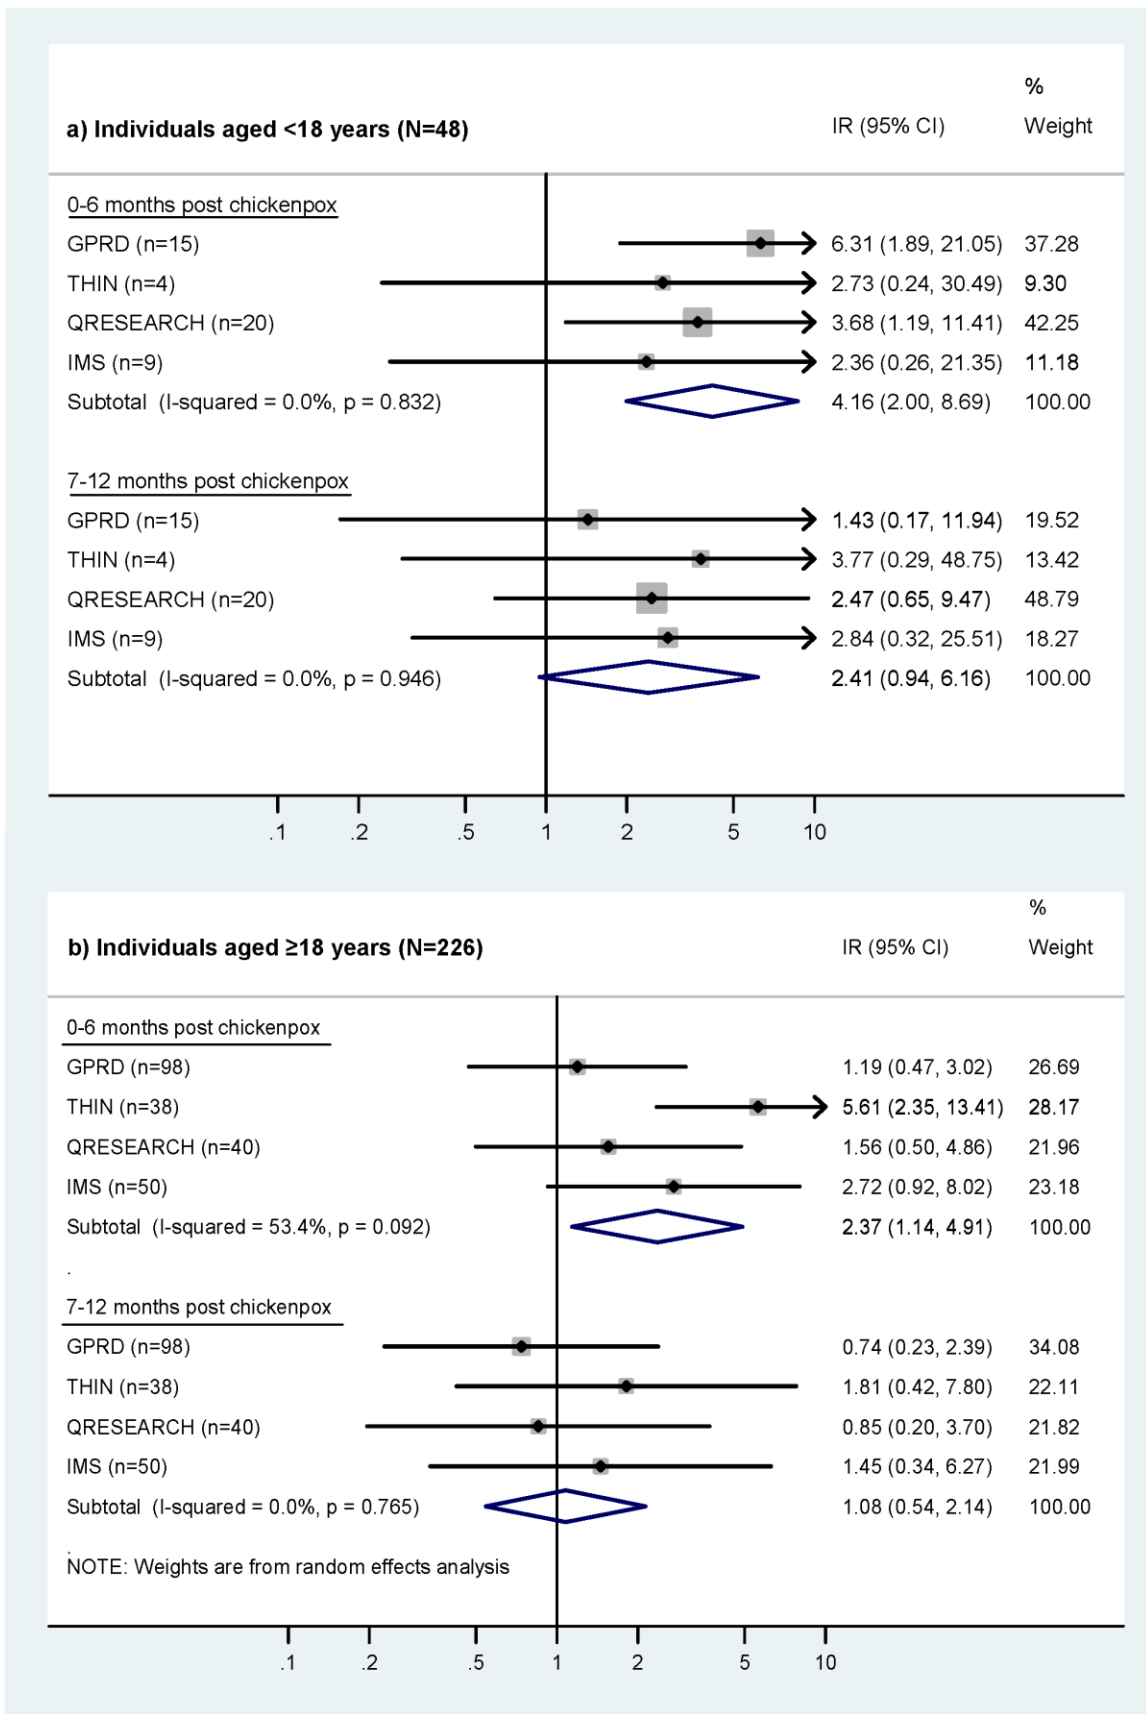

Supplement: supp_cit659_cit659supp_fig1.pdf [file supp_cit659_cit659supp_fig1.pdf]
